# Supplementary material for: Opposing Regulation of PROX1 by Interleukin-3 Receptor and NOTCH Directs Differential Host Cell Fate Reprogramming by Kaposi Sarcoma Herpes Virus
Source: PubMed Central journal article supplement (PMC3375311; doi:10.1371/journal.ppat.1002770), 2012-06-14
Supplement: ppat.1002770.s001.pdf [file ppat.1002770.s001.pdf]

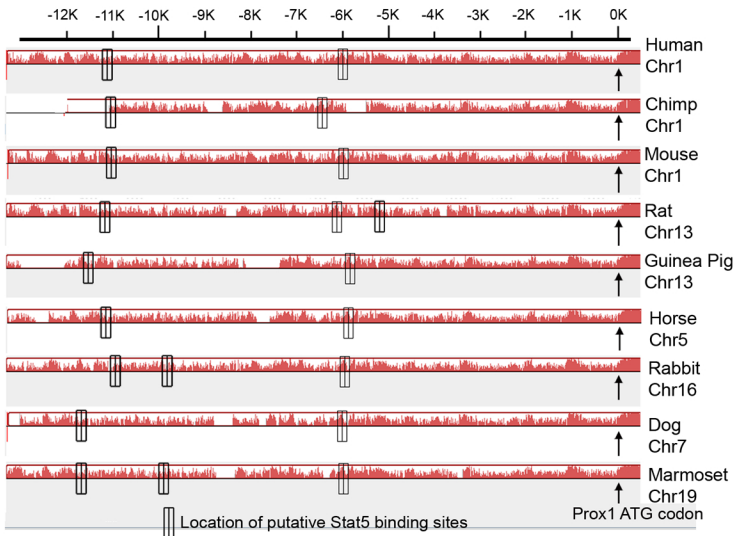

| Species    | Consensus Sequence (TTCYNRGAA)  |
|------------|---------------------------------|
| Human      | TTCTCAGAA, TTCCGAGAA            |
| Chimp      | TTCTATGAA, TTCCGAGAA            |
| Mouse      | TGCTGGGAA, TTCCTAGAA            |
| Rat        | TTTTAAGAA, TTCCTAGAA, TTCTCAGAA |
| Guinea Pig | TTCTTGGAG, TTCCGAGAA            |
| Horse      | TTCCAGAA, TTCCAAGAA             |
| Rabbit     | TTCCGGAA, TTCTCAGAA, TTCCAAGAA  |
| Dog        | TTCCAGAA, TTCCAAGAA             |
| Marmoset   | TTCCAGAA, TTCCTAGAA, TTCCGAGAA  |

Supplemental Fig.S1
