# Supplementary material for: Opposing Regulation of PROX1 by Interleukin-3 Receptor and NOTCH Directs Differential Host Cell Fate Reprogramming by Kaposi Sarcoma Herpes Virus
Source: PubMed Central journal article supplement (PMC3375311; doi:10.1371/journal.ppat.1002770), 2012-06-14
Supplement: ppat.1002770.s002.pdf [file ppat.1002770.s002.pdf]

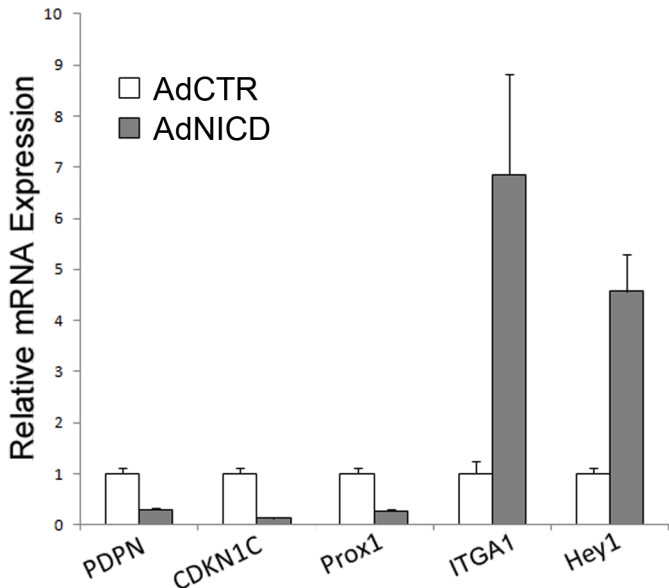

Supplemental Fig.2
